# Supplementary material for: Spontaneous single-crystal to single-crystal transition with self-healing cracks involving solvent exchange
Source: Royal Society of Chemistry journal article supplement (doi:10.1039/c8ce02110d), 2019-01-01
Supplement: c8ce02110d1.pdf [file c8ce02110d1.pdf]

## Electronic Supporting Information

### Spontaneous single-crystal to single-crystal transition with self-healing cracks involving solvent exchange

<sup>1</sup> Department of Chemistry, Zhejiang University, Hangzhou 310028, China

<sup>2</sup> Department of Physics and Department of Materials Science and Engineering, City University of Hong Kong, Tat Chee Avenue, Kowloon, Hong Kong, China

Email: [tangguping@zju.edu.cn](mailto:tangguping@zju.edu.cn) (G.P. Tang); [paul.chu@cityu.edu.hk](mailto:paul.chu@cityu.edu.hk) (P.K. Chu)

|   |                                                            |    |
|---|------------------------------------------------------------|----|
| 1 | Crystallization of darunavir ethanolate and dihydrate      | 2  |
| 2 | FTIR spectra of darunavir ethanolate and dihydrate         | 3  |
| 3 | SXRD of darunavir ethanolate and dihydrate                 | 4  |
| 4 | Hirshfeld surface analysis and 2D finger print plot        | 7  |
| 5 | Material Studio data of darunavir ethanolate and dihydrate | 9  |
| 6 | DSC and TGA profiles of darunavir ethanolate and dihydrate | 10 |
| 7 | Charge distribution and electrostatic potential            | 11 |
| 8 | References                                                 | 12 |

## 1. Crystallization of darunavir ethanolate and dihydrate

Darunavir ethanolate was crystallized from ethyl alcohol by slow evaporation to obtain colorless crystals (Figure 1 a). Darunavir dihydrate was crystallized using two methods. In the first method, the single-crystal to single-crystal transformation from ethanolate was conducted in water vapor (Figure 1c). In the second method, darunavir was directly recrystallized from acetonitrile solution (Figure 1b).

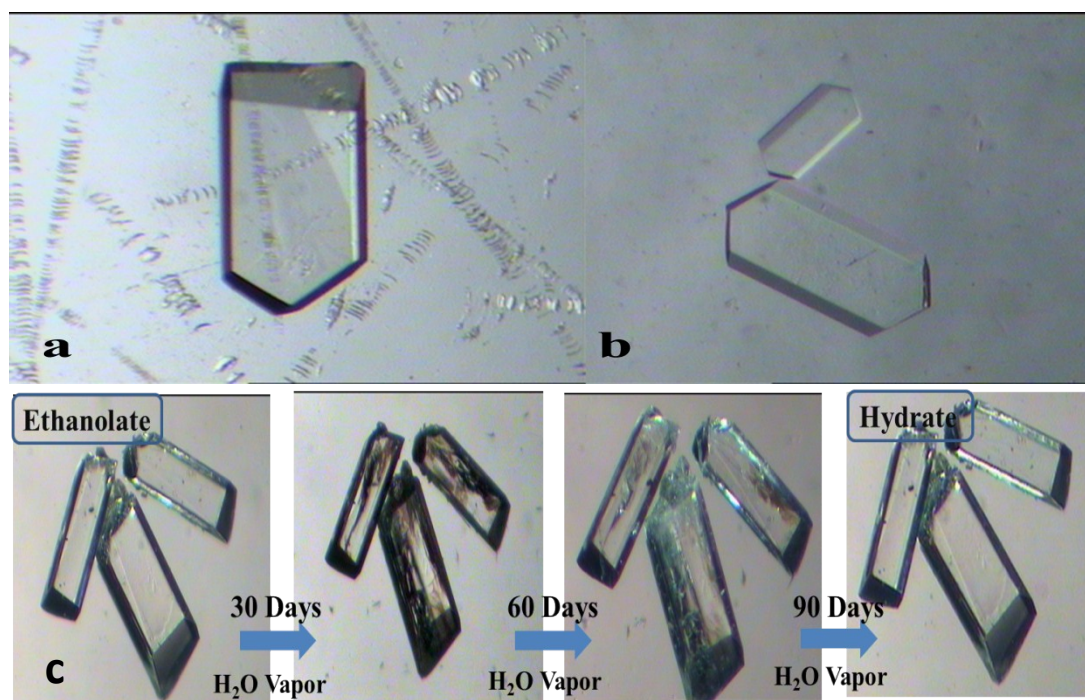

**Figure 1.** Photographs of the darunavir ethanolate and darunavir dihydrate crystals.

## 2. FTIR spectra of darunavir ethanolate and dihydrate

Fourier transform infrared (FTIR) spectra were acquired on the Varian Excalibur™ FT-IR spectrometer from the powder form of darunavir ethanolate and dihydrate in KBr discs between 500 and 4,000  $\text{cm}^{-1}$ .

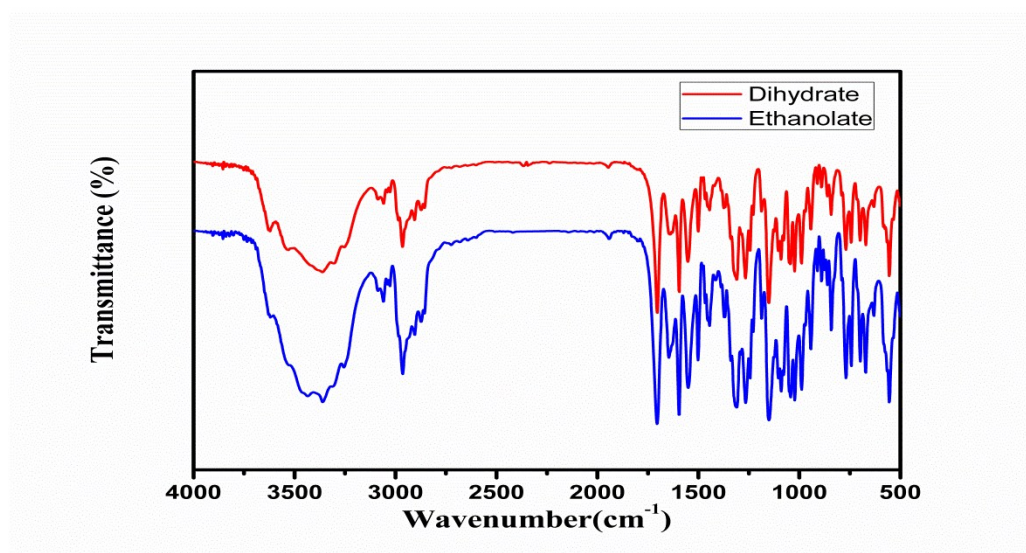

**Figure 2.** FTIR spectra of darunavir ethanolate and dihydrate showing different hydrogen bonding patterns. Darunavir dihydrate shows two distinct OH stretching bands: a broad band from 3,041 to 3,530  $\text{cm}^{-1}$  suggesting the presence of hydrogen-bonded OH groups and a sharp peak at 3629  $\text{cm}^{-1}$  indicating non-hydrogen-bonded OH groups. Darunavir ethanolate shows only a broad OH stretching band from 3,264 to 3,619  $\text{cm}^{-1}$ , suggesting that only hydrogen-bonded OHs are present. FTIR suggests that in darunavir dihydrate, there are  $\text{H}_2\text{O}$  molecules in which OH doesn't form hydrogen bond with the drug molecule.

### 3. Single crystal XRD of darunavir ethanolate and dihydrate

Table 1. The hydrogen bond lengths of darunavir ethanolate and dihydrate

|                             | Interaction | D-H...A        | D...A (Å) | Symmetry code    |
|-----------------------------|-------------|----------------|-----------|------------------|
| <b>Darunavir dihydrate</b>  | O-H...O     | O3-H3C...O1W   | 2.923(2)  | X,Y,Z            |
|                             |             | O1W-H1WB...O2W | 2.888(2)  | X,Y,Z            |
|                             |             | O1W-H1WA...O1  | 2.950(2)  | 1-X,1/2+Y,1/2-Z  |
|                             | N-H...O     | N2-H2A...O6    | 2.948(2)  | -1/2+X,1.5-Y,-Z  |
|                             |             | N3-H3B...O4    | 3.065(2)  | 2-X,-1/2+Y,1/2-Z |
| <b>Darunavir ethanolate</b> | O-H...O     | O3-H3C...O8    | 2.963(2)  | 1-X,-1/2+Y,1/2-Z |
|                             |             | O8-H8...O1     | 2.846(2)  | X,Y,Z            |
|                             | N-H...O     | N2-H2A...O6    | 2.970(2)  | 1/2+X,1/2-Y,-Z   |

Table 2. Crystal data of ethanolate and dihydrate.

|                       | <b>Darunavir ethanolate</b> | <b>Darunavir dihydrate</b> |
|-----------------------|-----------------------------|----------------------------|
| <b>CCDC number</b>    | 1863702                     | 1854201                    |
| <b>Temperature(K)</b> | 296(2)                      | 296(2)                     |
| <b>Crystal system</b> | orthorhombic                | orthorhombic               |
| <b>Space group</b>    | P 21 21 21                  | P 21 21 21                 |
| <b>Z</b>              | 4                           | 4                          |
| <b>Formula weight</b> | 593.72                      | 583.69                     |

|                                                            |                                                               |                                                               |
|------------------------------------------------------------|---------------------------------------------------------------|---------------------------------------------------------------|
| <b><i>a</i> (Å)</b>                                        | 9.9846(5)                                                     | 9.9965(5)                                                     |
| <b><i>b</i> (Å)</b>                                        | 16.6017(10)                                                   | 16.5620(10)                                                   |
| <b><i>c</i> (Å)</b>                                        | 19.0274(10)                                                   | 18.7532(11)                                                   |
| <b><math>\alpha</math> (degree)</b>                        | 90                                                            | 90                                                            |
| <b><math>\beta</math> (degree)</b>                         | 90                                                            | 90                                                            |
| <b><math>\gamma</math> (degree)</b>                        | 90                                                            | 90                                                            |
| <b>Cell volume (Å<sup>3</sup>)</b>                         | 3154.0(3)                                                     | 3104.8(3)                                                     |
| <b><math>\rho_{\text{calcd}}</math> (g/cm<sup>3</sup>)</b> | 1.250                                                         | 1.249                                                         |
| <b><math>\lambda</math> (MoK<math>\alpha</math>) (Å)</b>   | 0.71073                                                       | 0.71073                                                       |
| <b><math>\mu/\text{mm}^{-1}</math></b>                     | 0.154                                                         | 0.157                                                         |
| <b>F(000)</b>                                              | 1272.0                                                        | 1248.0                                                        |
| <b>Radiation</b>                                           | MoK $\alpha$ ( $\lambda = 0.71073$ )                          | MoK $\alpha$ ( $\lambda = 0.71073$ )                          |
| <b>2<math>\Theta</math> range for data collection/°</b>    | 6.382 to 51.992                                               | 6.446 to 58.814                                               |
| <b>Index ranges</b>                                        | $-11 \leq h \leq 12, -20 \leq k \leq 20, -23 \leq l \leq 23$  | $-9 \leq h \leq 12, -21 \leq k \leq 16, -23 \leq l \leq 23$   |
| <b>Reflections collected</b>                               | 26982                                                         | 22461                                                         |
| <b>Independent reflections</b>                             | 6191 [ $R_{\text{int}} = 0.1089, R_{\text{sigma}} = 0.0931$ ] | 7509 [ $R_{\text{int}} = 0.0369, R_{\text{sigma}} = 0.0410$ ] |
| <b>Data/restraints/parameters</b>                          | 6191/13/375                                                   | 7509/61/395                                                   |
| <b>Goodness-of-fit on F<sup>2</sup></b>                    | 1.103                                                         | 0.971                                                         |
| <b>Final R indexes [<math>I \geq 2\sigma(I)</math>]</b>    | $R_1 = 0.0923, wR_2 = 0.1391$                                 | $R_1 = 0.0455, wR_2 = 0.1003$                                 |
| <b>Final R indexes [all data]</b>                          | $R_1 = 0.1451, wR_2 = 0.1592$                                 | $R_1 = 0.0725, wR_2 = 0.1175$                                 |

|                                                       |            |            |
|-------------------------------------------------------|------------|------------|
| <b>Largest diff. peak/hole /<br/>e Å<sup>-3</sup></b> | 0.29/-0.31 | 0.18/-0.27 |
| <b>Flack parameter</b>                                | 0.01(5)    | 0.01(3)    |

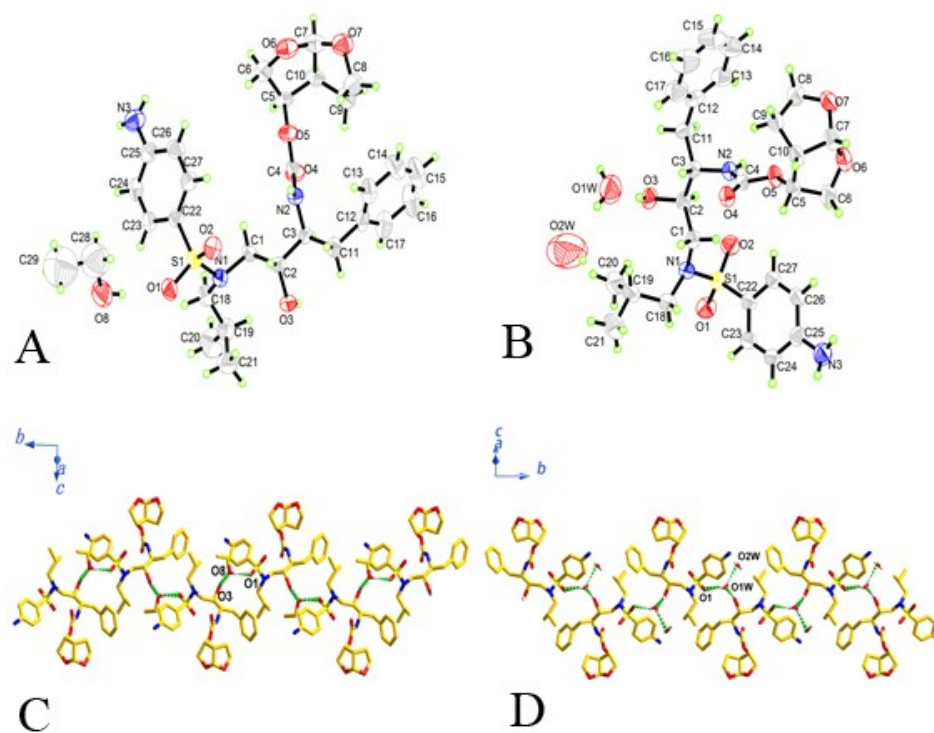

**Figure 3.** The molecular structure of the darunavir ethanolate (A) and dihydrate (B) , showing the atom labelling scheme and displacement ellipsoids at the 50% probability level. H atoms are shown as small circles of arbitrary radii. And (C, D ) Packing diagram of darunavir ethanolate and dihydrate.

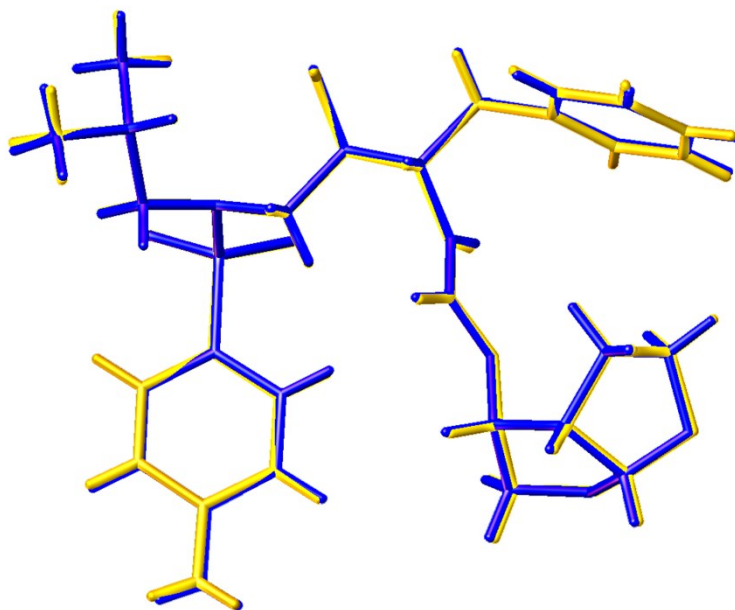

**Figure 4.** Overlay of conformers of darunavir ethanolate and dihydrate (overlaid using Olex2 software)

#### 4. Hirshfeld surface analysis and 2D finger print plot

Hirshfeld surface analysis was carried out to distinguish polymorphs with the software CrystalExplorer 3.0 . The Hirshfeld surface on the molecule in a crystal is constructed by calculating the spherical atom electron densities. On the surface, when intermolecular contacts are shorter than the sum of van der Waals radii, they are highlighted in red, whereas longer contacts are shown in blue and contacts around the sum of van der Waals radii are in white.



## 5. Material Studio data of darunavir ethanolate and dihydrate

Table 3. Crystal surface data of ethanolate and dihydrate.

|                         | hkl       | Surface area |
|-------------------------|-----------|--------------|
| Darunavir<br>ethanolate | { 0 1 1 } | 252.1301089  |
|                         | { 0 0 2 } | 165.7613338  |
|                         | { 1 0 1 } | 356.7373466  |
|                         | { 1 1 0 } | 368.6156354  |
|                         | { 0 2 0 } | 189.980978   |
| Darunavir<br>dihydrate  | { 0 1 1 } | 250.108825   |
|                         | { 0 0 2 } | 165.562033   |
|                         | { 1 0 1 } | 351.9619929  |
|                         | { 1 1 0 } | 362.7810569  |
|                         | { 0 2 0 } | 187.4663638  |

## 6. DSC and TGA profiles of darunavir ethanolate and dihydrate

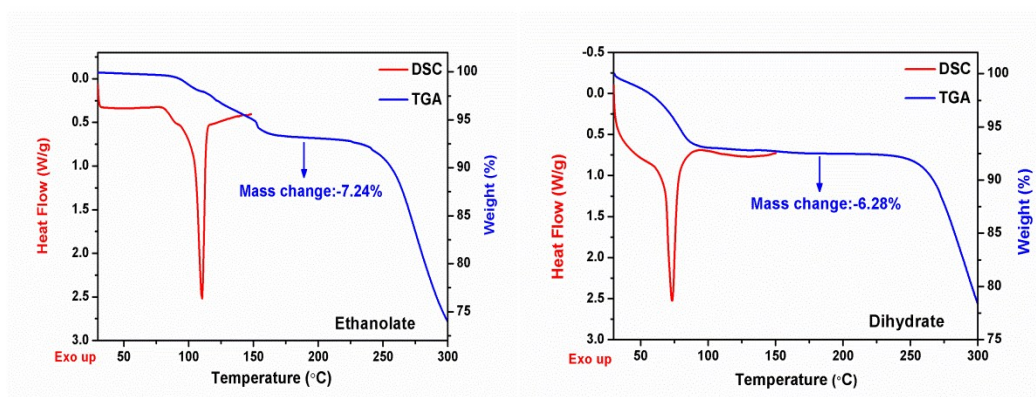

Figure 6. TGA and DSC of darunavir ethanolate and dihydrate

## 7. TGA profiles of SCSC transformation from DLNW-EA to DLNW-2H

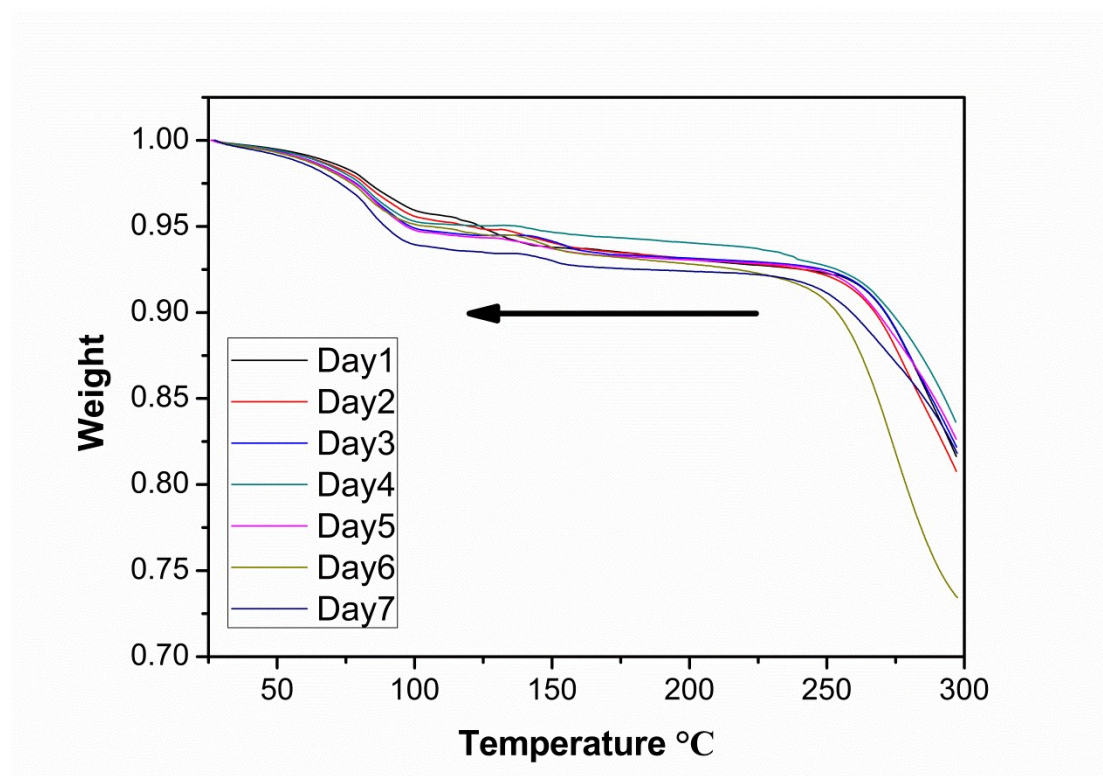

Figure 7. TGA of SCSC transformation process through 7days

## 8. Charge distribution and electrostatic potential

The experimentally determined single crystals structures with X–H bond lengths constrained to standard neutron diffraction values were used in the intermolecular interaction energy calculation. The energies were calculated between all unique nearest neighbor molecular pairs in the darunavir structure using Multifwn<sup>1</sup> and Gaussian09<sup>2</sup>. The model used the B3LYP/6-31G(d,p) molecular wave functions calculated by applying the molecular geometries extracted from the crystal structures. Each energy term was scaled independently to fit a large training set of B3LYP/6-31G(d,p) counterpoise.

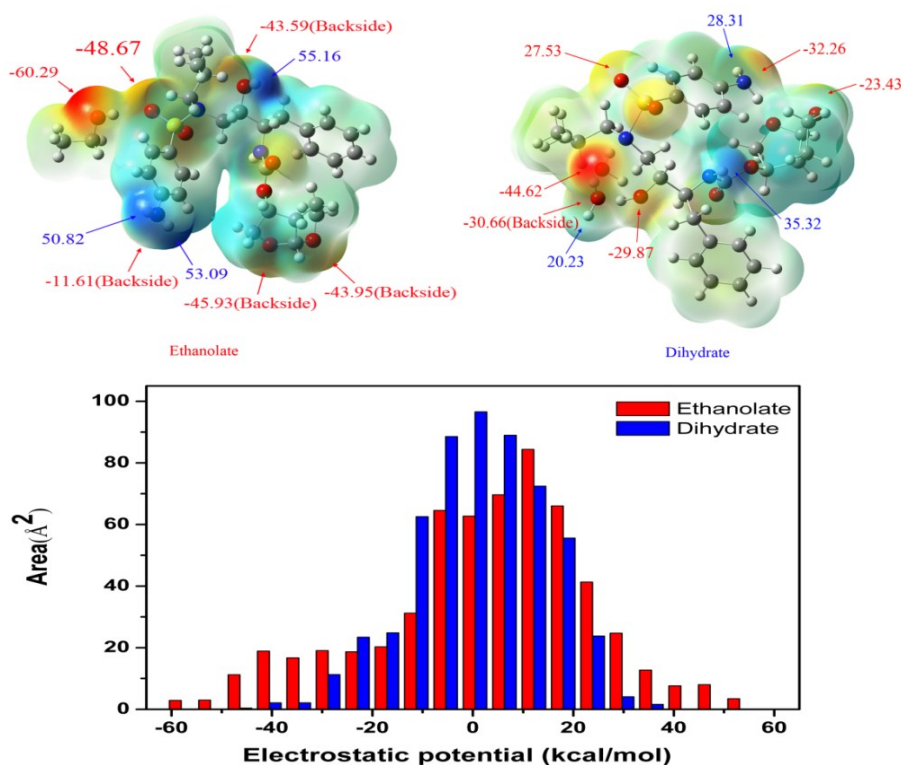

Figure 8. ESP-mapped molecular vdw surface of darunavir ethanolate and darunavir dehydrate (unit of kcal/mol). The surface local minima and maxima of ESP are represented by red and blue arrows.

## References

1. Tian Lu, Feiwu Chen, Quantitative analysis of molecular surface based on improved Marching Tetrahedra algorithm, *J. Mol. Graph. Model.*, 38, 314-32
2. M. J. Frisch, G. W. Trucks, H. B. Schlegel, G. E. Scuseria, M. A. Robb, J. R. Cheeseman, G. Scalmani, V. Barone, B. Mennucci, G. A. Petersson, H. Nakatsuji, M. Caricato, X. Li, H. P. Hratchian, A. F. Izmaylov, J. Bloino, G. Zheng, J. L. Sonnenberg, M. Hada, M. Ehara, K. Toyota, R. Fukuda, J. Hasegawa, M. Ishida, T. Nakajima, Y. Honda, O. Kitao, H. Nakai, T. Vreven, J. A. Montgomery, Jr., J. E. Peralta, F. Ogliaro, M. Bearpark, J. J. Heyd, E. Brothers, K. N. Kudin, V. N. Staroverov, T. Keith, R. Kobayashi, J. Normand, K. Raghavachari, A. Rendell, J. C. Burant, S. S. Iyengar, J. Tomasi, M. Cossi, N. Rega, J. M. Millam, M. Klene, J. E. Knox, J. B. Cross, V. Bakken, C. Adamo, J. Jaramillo, R. Gomperts, R. E. Stratmann, O. Yazyev, A. J. Austin, R. Cammi, C. Pomelli, J. W. Ochterski, R. L. Martin, K. Morokuma, V. G. Zakrzewski, G. A. Voth, P. Salvador, J. J. Dannenberg, S. Dapprich, A. D. Daniels, O. Farkas, J. B. Foresman, J. V. Ortiz, J. Cioslowski, and D. J. Fox, Gaussian, Inc., Wallingford CT, 2010.
